# Supplementary material for: Unusual strong fluorescence of a hyperbranched phosphate: discovery and explanations
Source: Royal Society of Chemistry journal article supplement (doi:10.1039/c3ra22680h), 2013-01-01
Supplement: c3ra22680h.pdf [file c3ra22680h.pdf]

Supplementary Information

**Strong Fluorescence of a Hyperbranched Phosphate: Origins and Dependence on Various Factors**

Tuan Liu, Yan Meng, Xiaochen Wang, Haiqiao Wang and Xiaoyu Li

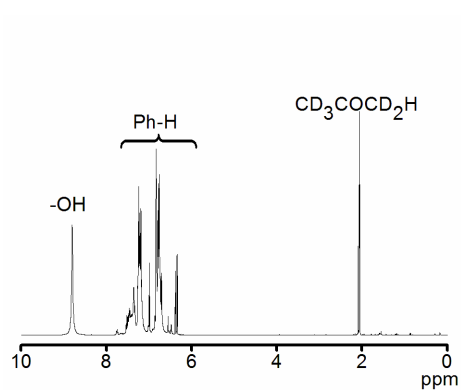

**Figure S1.** The  $^1\text{H}$  NMR spectra of HHPP.

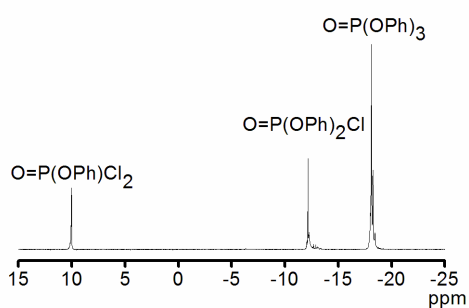

**Figure S2.** The  $^{31}\text{P}$  NMR spectra of HHPP.

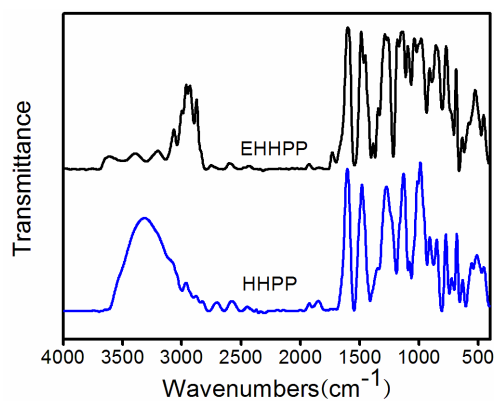

**Figure S3.** FTIR spectra of HHPP (bottom red curve) and EHHPP (top black curve).

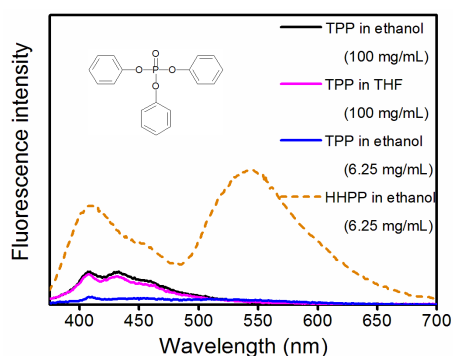

**Figure S4.** The fluorescence spectra of TPP in ethanol and THF solutions at a concentration of 100 mg/mL are shown as black and red curves. The fluorescence spectra of HHPP (dashed curve) and TPP (blue curve) at the concentration of 6.25 mg/mL in ethanol are also shown. The chemical structure of TTP is also shown.

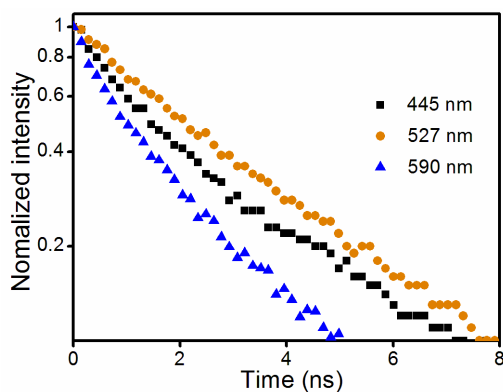

**Figure S5.** Time-resolved fluorescence decays for HHPP in ethanol at pH=11. The three wavelengths correspond with the three maximum peaks in Figure 6B.
